# Supplementary material for: MicroRNA-191-5p diminished sepsis-induced acute kidney injury through targeting oxidative stress responsive 1 in rat models
Source: PubMed Central journal article supplement (PMC6692571; doi:10.1042/bsr20190548), 2019-08-13

**A**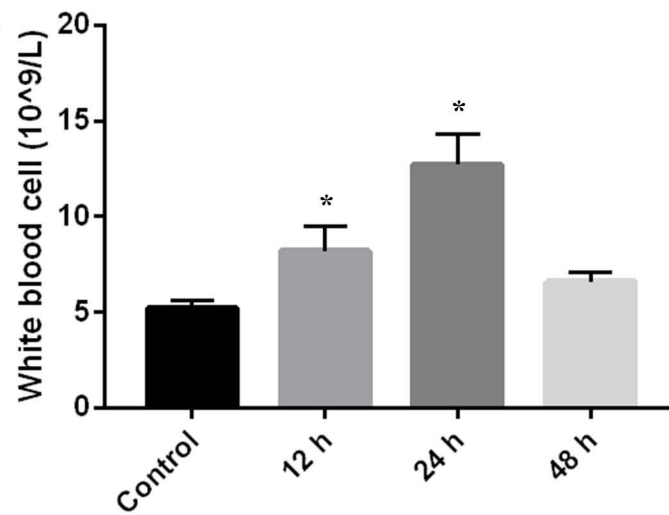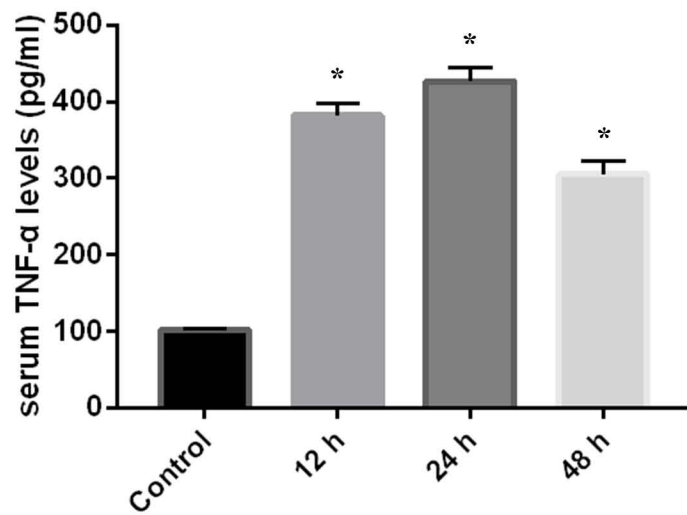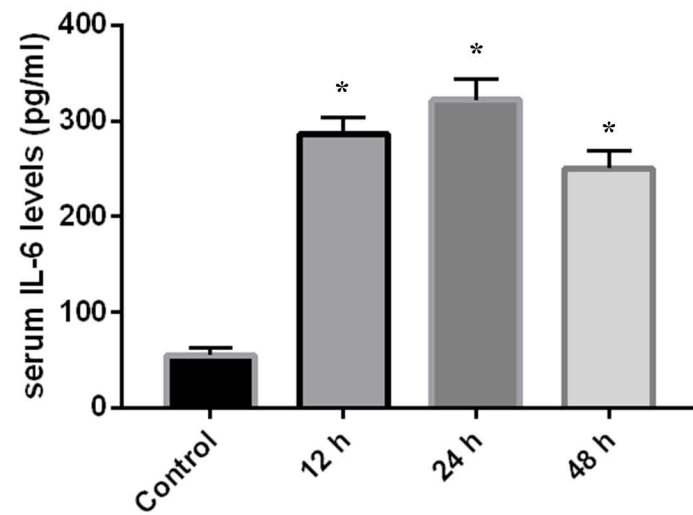**B**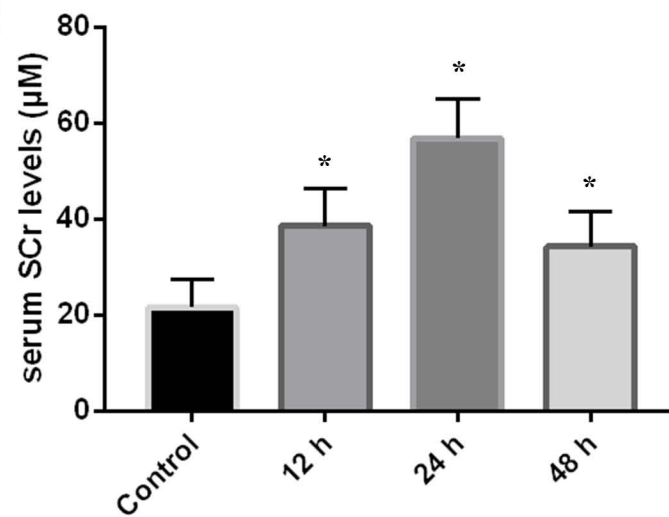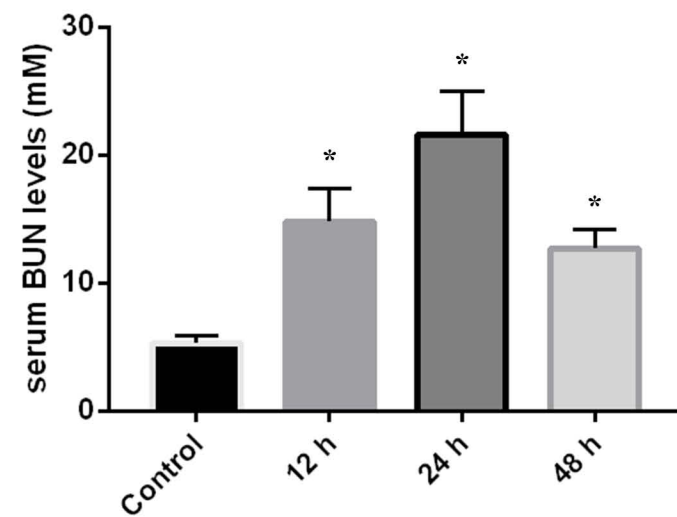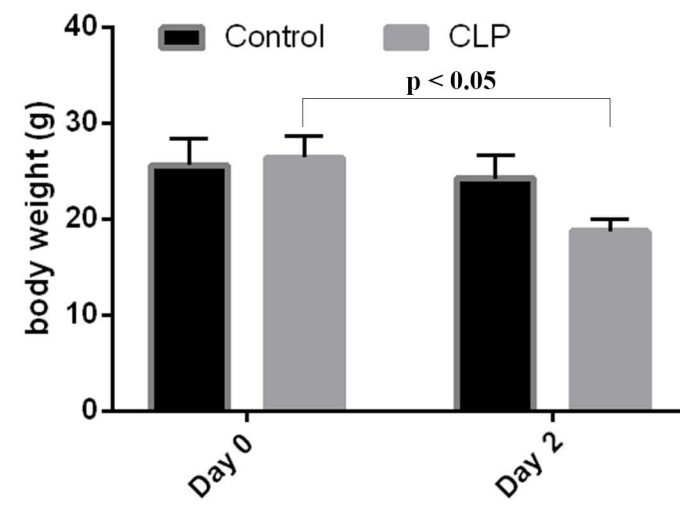

Supplement: bsr20190548_Supp1.pdf [file bsr20190548_Supp1.pdf]
